# Supplementary material
Source: PubMed Central journal article supplement (PMC4293204)
Supplement: NIHMS639495-supplement-1.pdf [file NIHMS639495-supplement-1.pdf]

**Supplementary Figure S1 shows the treatment scheme for GdCl<sub>3</sub> (A), and analysis of tissue for T-cells and neutrophils (B), or for presence of PanIN lesions (C).**

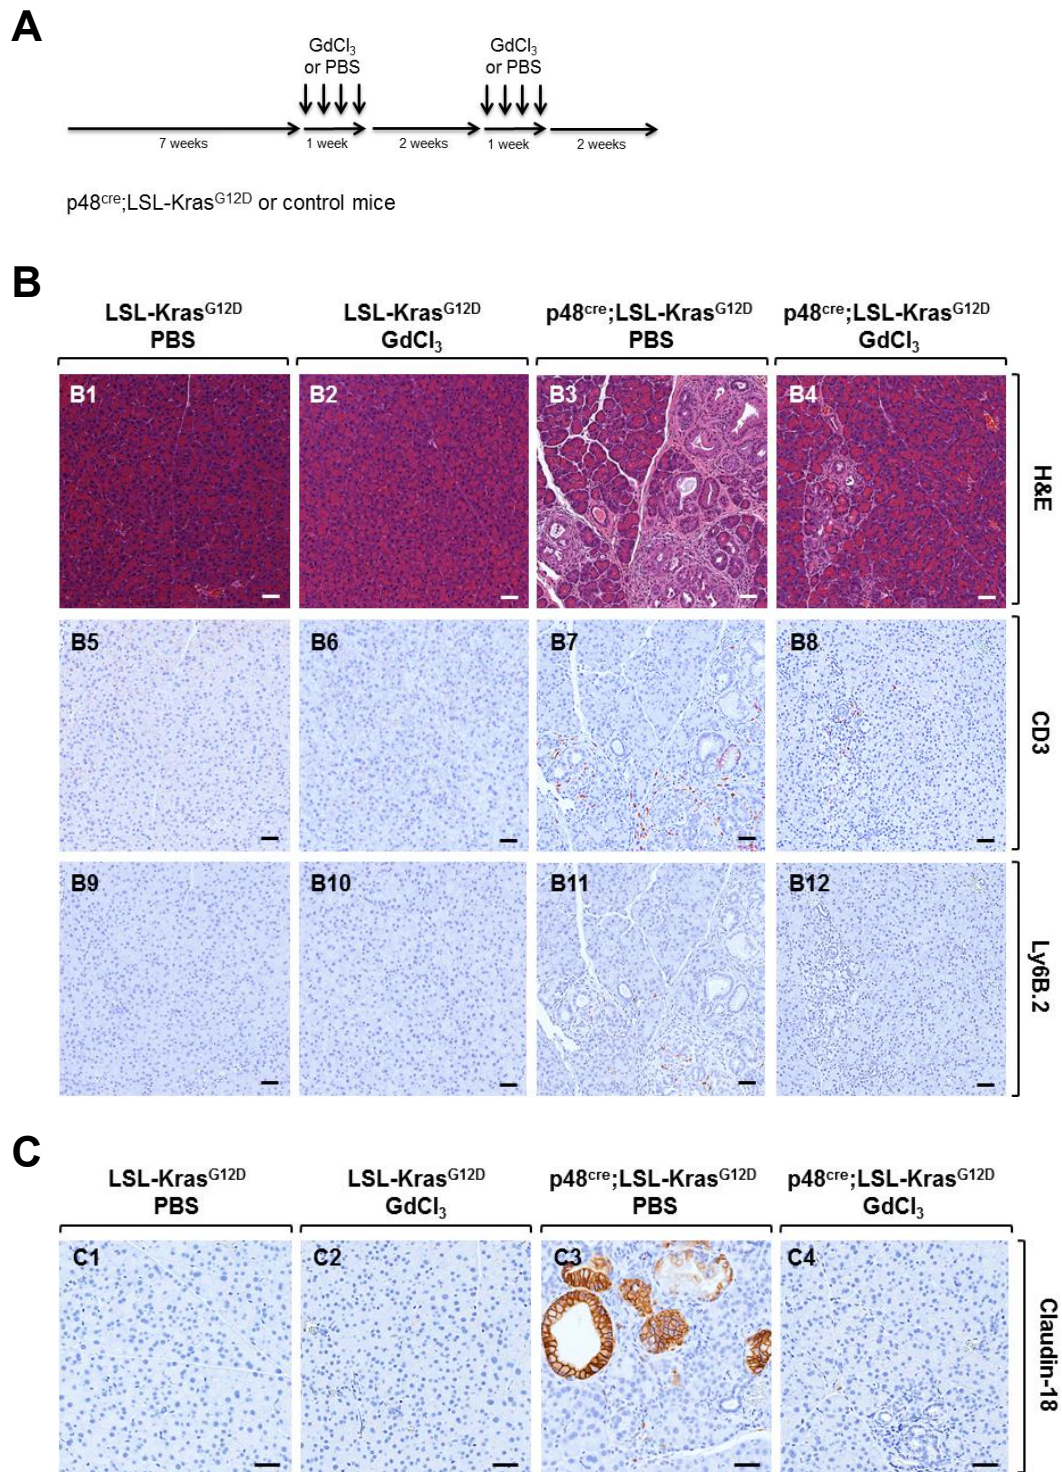

**Supplementary Figure S1. (A)** Treatment scheme for Figure 1. **(B)** Control (ntg, p48<sup>cre</sup> and LSL-Kras<sup>G12D</sup> mice; shown are only LSL-Kras<sup>G12D</sup> or p48<sup>cre</sup>;LSL-Kras<sup>G12D</sup> mice were injected with GdCl<sub>3</sub> or PBS as indicated in (A). At the endpoint pancreata were harvested and either stained with H&E or analyzed by IHC for presence of CD3 positive (T-cells) or Ly6B.2 positive (neutrophils) cells. The scale bar is 50  $\mu$ m. **(C)** IHC staining of samples from Figure 1 for Claudin-18 expression (marker for PanIN lesions). The scale bar is 50  $\mu$ m.
