# Supplementary material
Source: PubMed Central journal article supplement (PMC4293204)
Supplement: NIHMS639495-supplement-4.pdf [file NIHMS639495-supplement-4.pdf]

**Supplementary Figure S4 shows controls for Figure 3A (A, B), data supporting Figure 3B (C), analysis of Raw264.7 cells for polarization markers (D), and controls for polarization of primary macrophages (E,F).**

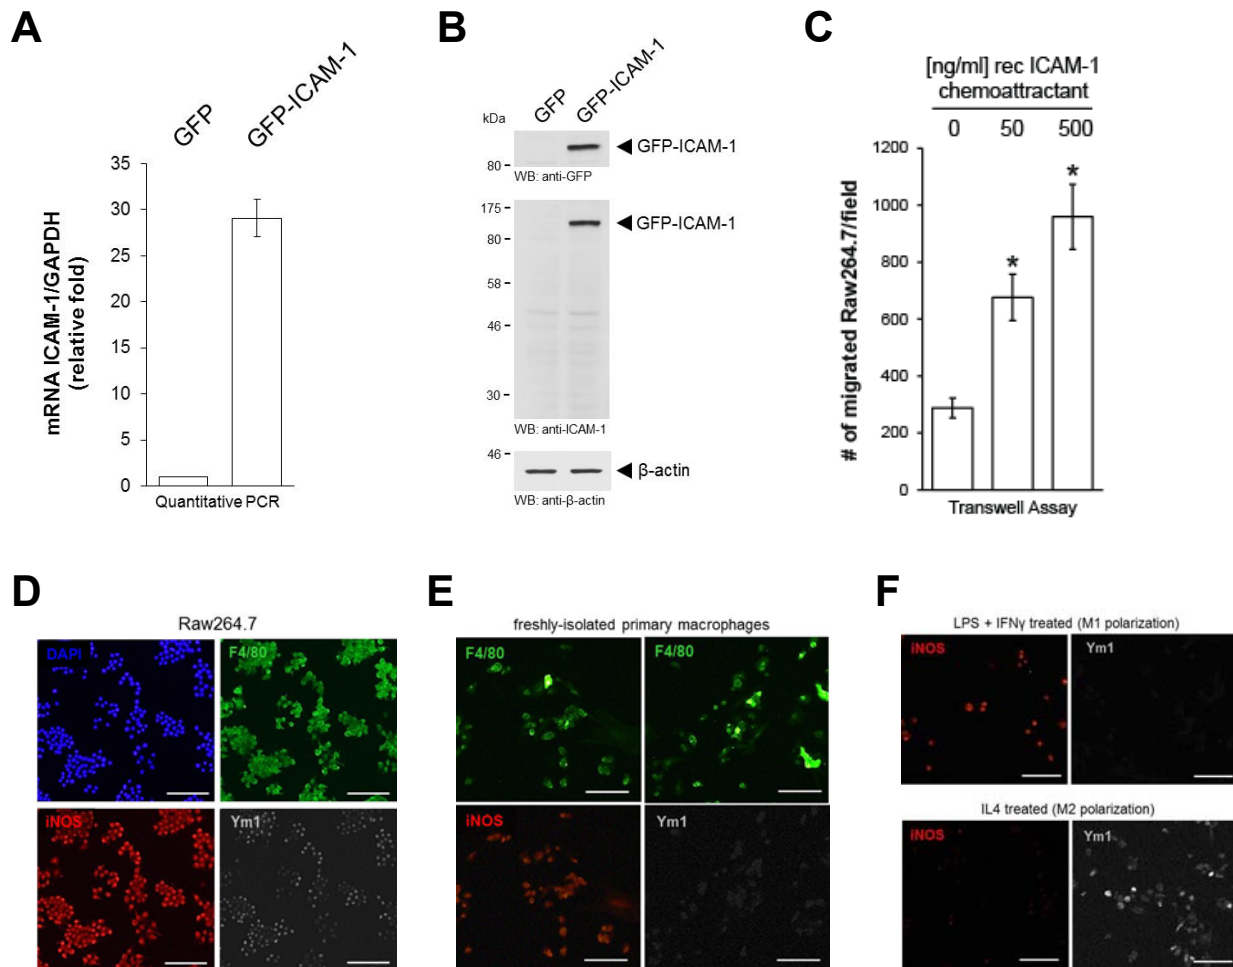

**Supplementary Figure S4. (A, B)** Cells from Figure 3A were analyzed for expression of ICAM1 using real-time quantitative PCR (A) or by Western blot using antibodies directed against GFP or ICAM-1 (B). Staining for  $\beta$ -actin served as loading control. **(C)** Raw264.7 macrophages were seeded in a Transwell chamber and migration towards recombinant ICAM1 (0, 50, 500 ng/ml) was determined (t = 16 hours). Shown are numbers of migrated macrophages per field. The asterisk indicates statistical significance as compared to the control. **(D)** Raw264.7 cells were analyzed by immunofluorescence for markers of M1 (iNOS) or M2 (Ym1) polarization. **(E)** Freshly-isolated peritoneal primary mouse macrophages were analyzed by immunofluorescence for markers of M1 (iNOS) or M2 (Ym1) polarization. **(F)** After treatment with IL4 (M2 polarization) or with LPS + IFN $\gamma$  (M1 polarization), primary mouse macrophages were analyzed by immunofluorescence for markers of M1 (iNOS) or M2 (Ym1) polarization. In D-F, the scale bar indicates 200  $\mu$ m.
