# Supplementary material
Source: PubMed Central journal article supplement (PMC4293204)
Supplement: NIHMS639495-supplement-6.pdf [file NIHMS639495-supplement-6.pdf]

**Supplementary Figure S6 shows an analysis of ADM events in 3D explant culture in presence of the MMP inhibitor GM6001.**

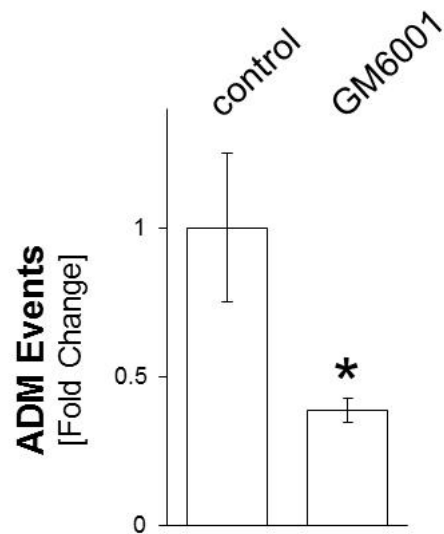

**Supplementary Figure S6.** Primary mouse pancreatic acinar cells from LSL-Kras<sup>G12D</sup> mice were isolated and infected with adeno-null virus (control) or adenovirus harboring *cre* recombinase to induce expression of oncogenic Kras. Cells then were seeded in 3D *explant* organoid culture in absence or presence of GM6001 (100 nM). ADM events were determined at day 5. The asterisk indicates statistical significance.
