# Supplementary material
Source: PubMed Central journal article supplement (PMC4293204)
Supplement: NIHMS639495-supplement-7.pdf [file NIHMS639495-supplement-7.pdf]

## **Supplementary Method (for Supplementary Figures S4D-S4F)**

### **Immunofluorescence analysis of macrophage polarization**

Raw264.7 cells, freshly-isolated primary mouse macrophages, or primary mouse macrophages after polarization were fixed in 4% paraformaldehyde-PBS for 10 minutes at RT. Cells then were permeabilized with 0.2 % Triton X-100 in PBS for 10 minutes at RT and incubated with protein block serum-free reagent (Dako) for 1 hour at RT. Primary antibodies (anti-F4/80 at 1:250; anti-iNOS at 1:100; anti-Ym1 at 1:200) were incubated overnight at 4 °C. Cells were then washed with PBS containing 0.05 % Tween-20 (PBST) and incubated with indicated 2<sup>nd</sup> antibody (AlexaFluor-488 or AlexaFluor-568, at 1:500) for 1 hour at RT. After vigorous washes with PBST, cells were mounted using PermaFluor mounting media (Thermo Scientific). Images were taken using an Olympus IX71 fluorescent microscope with a 10x objective and a DP70 digital camera and processed using Photoshop software.
